# Supplementary figures and images for: Stereotactic body radiation therapy for adrenal gland metastases: Outcomes and toxicity
Source: PubMed Central journal article supplement — Adv Radiat Oncol. 2018 May 24;3(4):621–9. doi: 10.1016/j.adro.2018.05.006 (PMC6200881; doi:10.1016/j.adro.2018.05.006), 2018-05-24

### Bowel V25

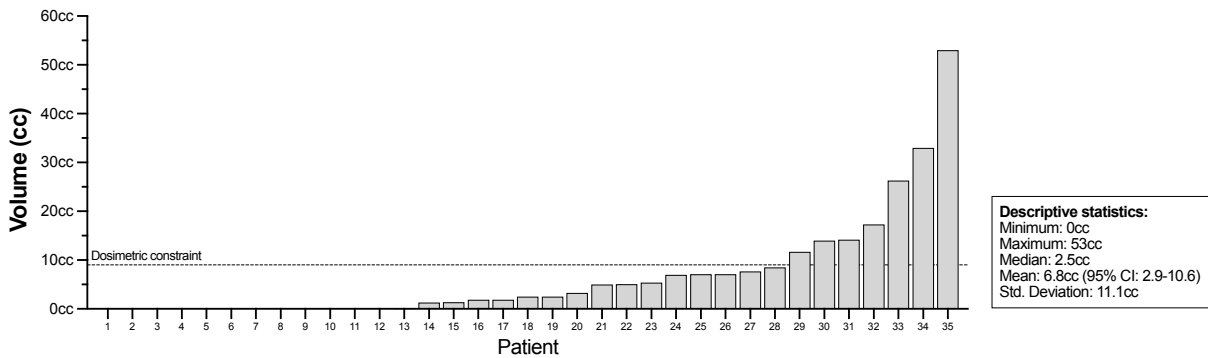

### Bowel V30

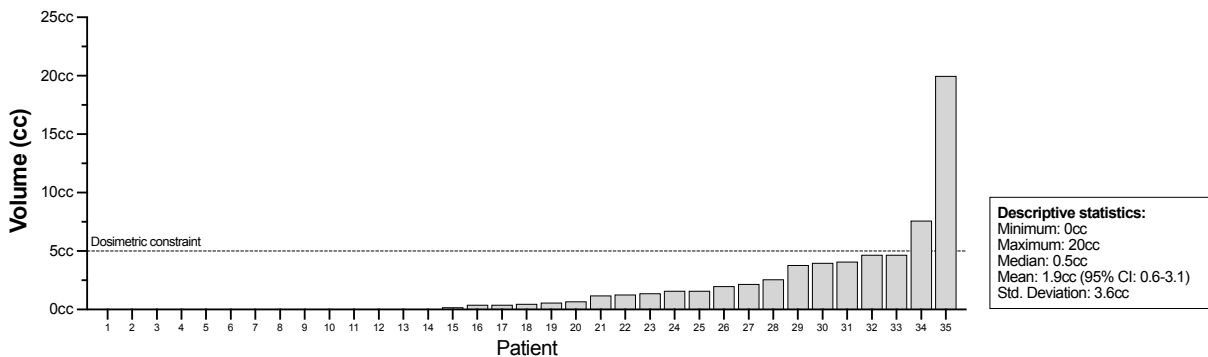

### Bowel V35

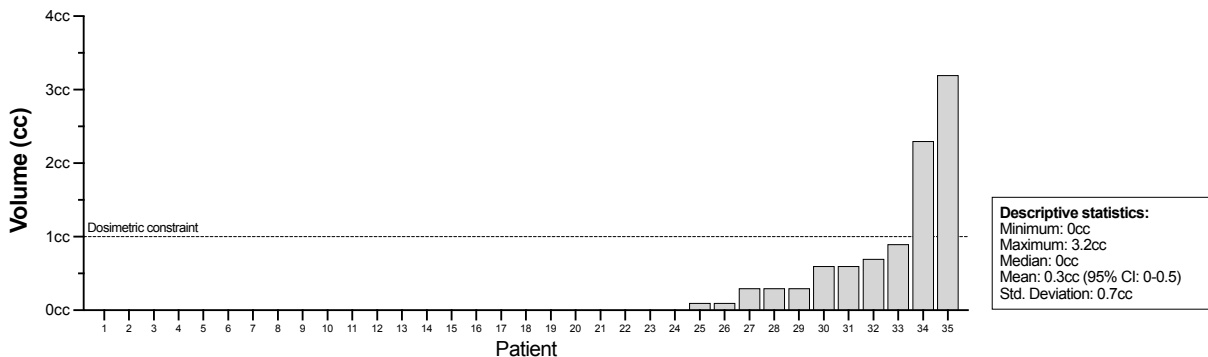

Supplement: mmc1.pdf [file mmc1.pdf]
